# Supplementary material
Source: PubMed Central journal article supplement (PMC4613920)
Supplement: supp_dc15-0625v150625_DC150625SupplementaryData.pdf [file supp_dc15-0625v150625_DC150625SupplementaryData.pdf]

SUPPLEMENTARY DATA

**Supplementary Table S1.**Correlations between total HDL cholesterol, HDL subclasses, HDL subclass/total HDL ratios, and independent variables of interest

|                                                       | Total HDL cholesterol | HDL2 cholesterol | HDL3 cholesterol | Apolipoprotein A-I | Total HDL cholesterol/apolipoprotein A-I |
|-------------------------------------------------------|-----------------------|------------------|------------------|--------------------|------------------------------------------|
| Total HDL cholesterol                                 |                       |                  |                  |                    |                                          |
| HDL2 cholesterol                                      | 0.94***               |                  |                  |                    |                                          |
| HDL3 cholesterol                                      | 0.75***               | 0.48***          |                  |                    |                                          |
| Apolipoprotein A-I <sup>†</sup>                       | 0.70***               | 0.59***          | 0.65***          |                    |                                          |
| Total HDL cholesterol/apolipoprotein A-I <sup>†</sup> | 0.68***               | 0.69***          | 0.39***          | -0.03              |                                          |
| Age                                                   | 0.01                  | -0.07            | 0.16**           | 0.34***            | -0.04                                    |
| Body mass index                                       | -0.44***              | -0.45***         | -0.27***         | -0.33***           | -0.24***                                 |
| Waist circumference                                   | -0.55***              | -0.58***         | -0.31***         | -0.41***           | -0.35***                                 |
| Systolic blood pressure                               | -0.22***              | -0.27***         | -0.05            | -0.05              | -0.22***                                 |
| Diastolic blood pressure                              | -0.30***              | -0.33***         | -0.13**          | -0.14*             | -0.27***                                 |
| Fasting plasma glucose                                | -0.23***              | -0.26***         | -0.09            | -0.06              | -0.14*                                   |
| 2 hour plasma glucose                                 | -0.08                 | -0.13*           | 0.05             | 0.09               | -0.08                                    |
| HOMA-IR                                               | -0.33***              | -0.33***         | -0.21***         | -0.24***           | -0.30***                                 |
| Total cholesterol                                     | 0.01                  | -0.08            | 0.17**           | 0.24***            | -0.15**                                  |
| LDL cholesterol                                       | -0.14**               | -0.24***         | 0.10             | 0.06               | -0.21***                                 |
| Triglyceride                                          | -0.45**               | -0.40***         | -0.38***         | -0.21***           | -0.42***                                 |
| Non-HDL cholesterol                                   | -0.37***              | -0.43***         | -0.13**          | -0.07              | -0.42***                                 |

\* $P < 0.05$ , \*\* $P < 0.001$ , and \*\*\* $P < 0.001$

SUPPLEMENTARY DATA

**Supplementary Table S2.** Multivariate logistic regression analysis of incident diabetes in relation to HDL cholesterol to apolipoprotein A-I ratio

|                                    | OR per 1-SD (95% CI) | <i>P</i> |
|------------------------------------|----------------------|----------|
|                                    | increment            |          |
| Age                                | 1.73 (1.19 – 2.53)   | 0.004    |
| BMI                                | 1.58 (1.08 – 2.30)   | 0.017    |
| Family history of diabetes         | 2.11 (1.02 – 4.39)   | 0.045    |
| 2 hour plasma glucose              | 4.16 (2.62 – 6.60)   | <0.001   |
| HDL cholesterol/apolipoprotein A-I | 0.58 (0.38 – 0.88)   | 0.010    |

Age, sex, BMI, waist circumference, family history of diabetes, systolic blood pressure, current smoking, alcohol consumption, regular physical activity, lipid lowering medications, triglyceride, HOMA-IR, 2 hour plasma glucose, and HDL cholesterol/apolipoprotein A-I were included in the model.
